# Supplementary material for: GPSM1 impairs metabolic homeostasis by controlling a pro-inflammatory pathway in macrophages
Source: Springer Nature journal article supplement (doi:10.1038/s41467-022-34998-9), 2022-11-25

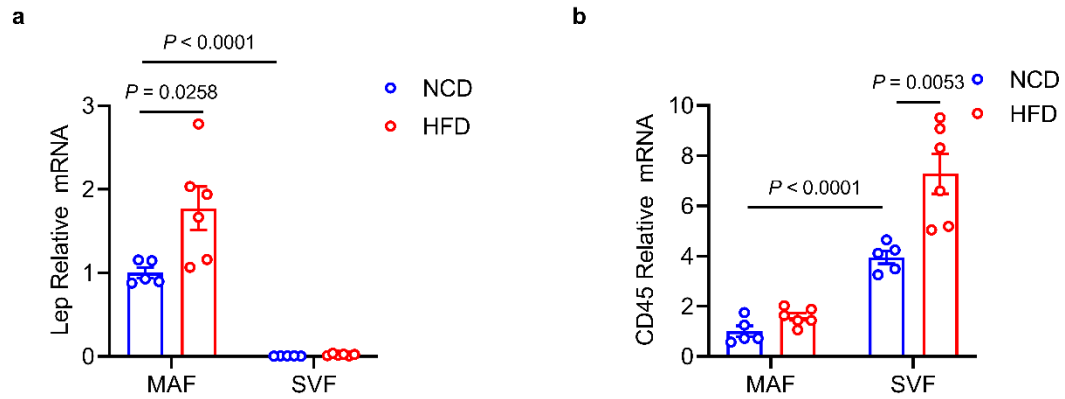

### Supplementary Fig.1 Fractionation studies of eWAT.

**a**, RT-qPCR of *Leptin* expression in SVF and MAF isolated from eWAT from NCD (n= 5 biologically independent sample) and HFD (n= 6 biologically independent sample) mice. **b**, RT-qPCR of *CD45* expression in SVF and MAF isolated from eWAT from NCD (n= 5 biologically independent sample) and HFD (n= 6 biologically independent sample) mice. Throughout, data are presented as means  $\pm$  SEM. *P* values are determined by unpaired two-tailed Student's t-test.

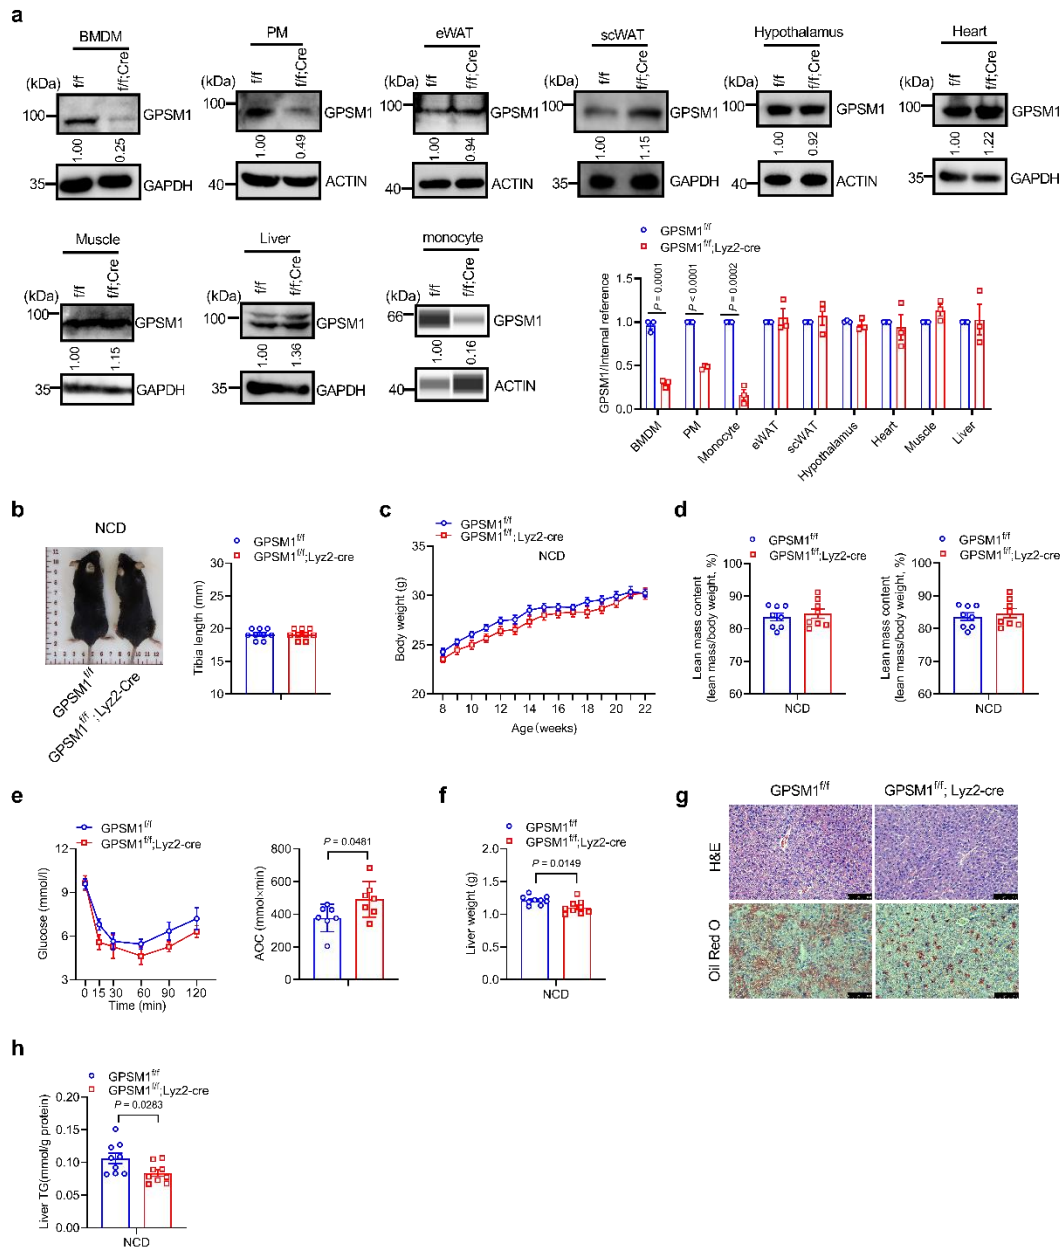

## Supplementary Fig.2 Metabolic characterization of male mice fed a NCD.

**a**, Representative immunoblot analysis and quantification of GPSM1 expression in BMDMs, Peritoneal macrophages (PMs), monocytes and the indicated tissues from *GPSM1<sup>fl/fl</sup>*; *Lyz2-cre* mice and *GPSM1<sup>fl/fl</sup>* mice ( $n = 3$  biologically independent mice per group). GAPDH and actin were used as loading controls. **b-g**, Male *GPSM1<sup>fl/fl</sup>*; *Lyz2-cre* mice and age-matched *GPSM1<sup>fl/fl</sup>* littermates were fed a NCD for 22 weeks. **b**, Representative image of mice (left) and quantification of tibia length (right) of the indicated genotype ( $n = 9$  biologically independent mice per group). **c**, Body weight ( $n = 10$  biologically independent mice per

group). **d**, Percent of fat (left), lean body mass (right).  $n = 8$  biologically independent mice per group. **e**, ITT and AOC ( $n = 7$  biologically independent mice per group). **f**, Liver weight ( $n = 9$  biologically independent mice per group). **g**, Representative images of H&E staining (top) and Oil Red O (bottom) staining of liver sections. Scale bars,  $100\ \mu\text{m}$ . **h**, Quantification of hepatic TG (right,  $n = 9$  biologically independent mice per group). Independent experiments were repeated three times with similar results (**g**). All data are shown as means  $\pm$  SEM (**a-f, h**). *P* values are determined by unpaired two-tailed Student's *t*-test (**a, b, d, f** and **h**) or two-way ANOVA with Sidak's multiple-comparisons test (**c, e**).

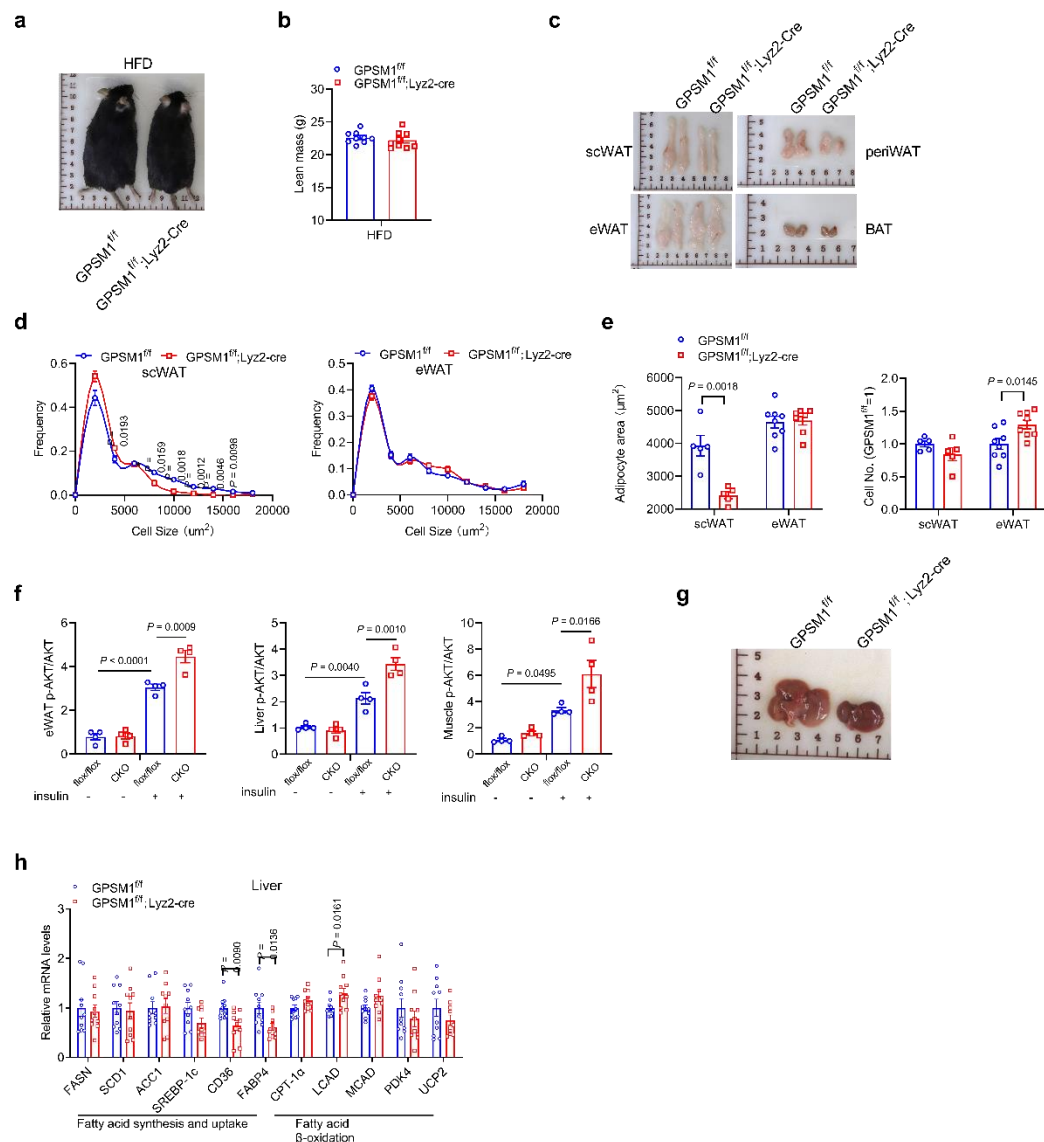

**Supplementary Fig.3 Metabolic characterization of male mice fed a HFD.**

**a**, Representative images of 7-week-old mice subjected to a HFD for 12 weeks. **b**, Lean mass was determined for mice fed a HFD (n = 9 biologically independent mice per group). **c**, Representative images of the indicated WAT from *GPSM1<sup>fl/fl</sup>*; *Lyz2-cre* and *GPSM1<sup>fl/fl</sup>* mice. **d**, Frequency distribution of adipocyte size of scWAT and eWAT (n = 5 biologically independent mice per group for scWAT and n = 8 biologically independent mice per group for eWAT). **e**, Quantification of adipocyte area (left) and cell number (right) of scWAT and eWAT. **f**, Quantification of pAKT/AKT in eWAT, liver and muscle (n = 4 biologically independent mice per group). **g**, Representative images of liver section. **h**, RT- qPCR analysis showing mRNA abundance of fatty acid synthesis and uptake genes and fatty acid

$\beta$ -oxidation genes in liver (n = 10 biologically independent mice per group). All data are shown as means  $\pm$  SEM. *P* values are determined by unpaired two-tailed Student's *t*-test (**b**, **d**, **e**, and **h**) or one-way ANOVA with Tukey's correction for multiple group comparison (**f**).

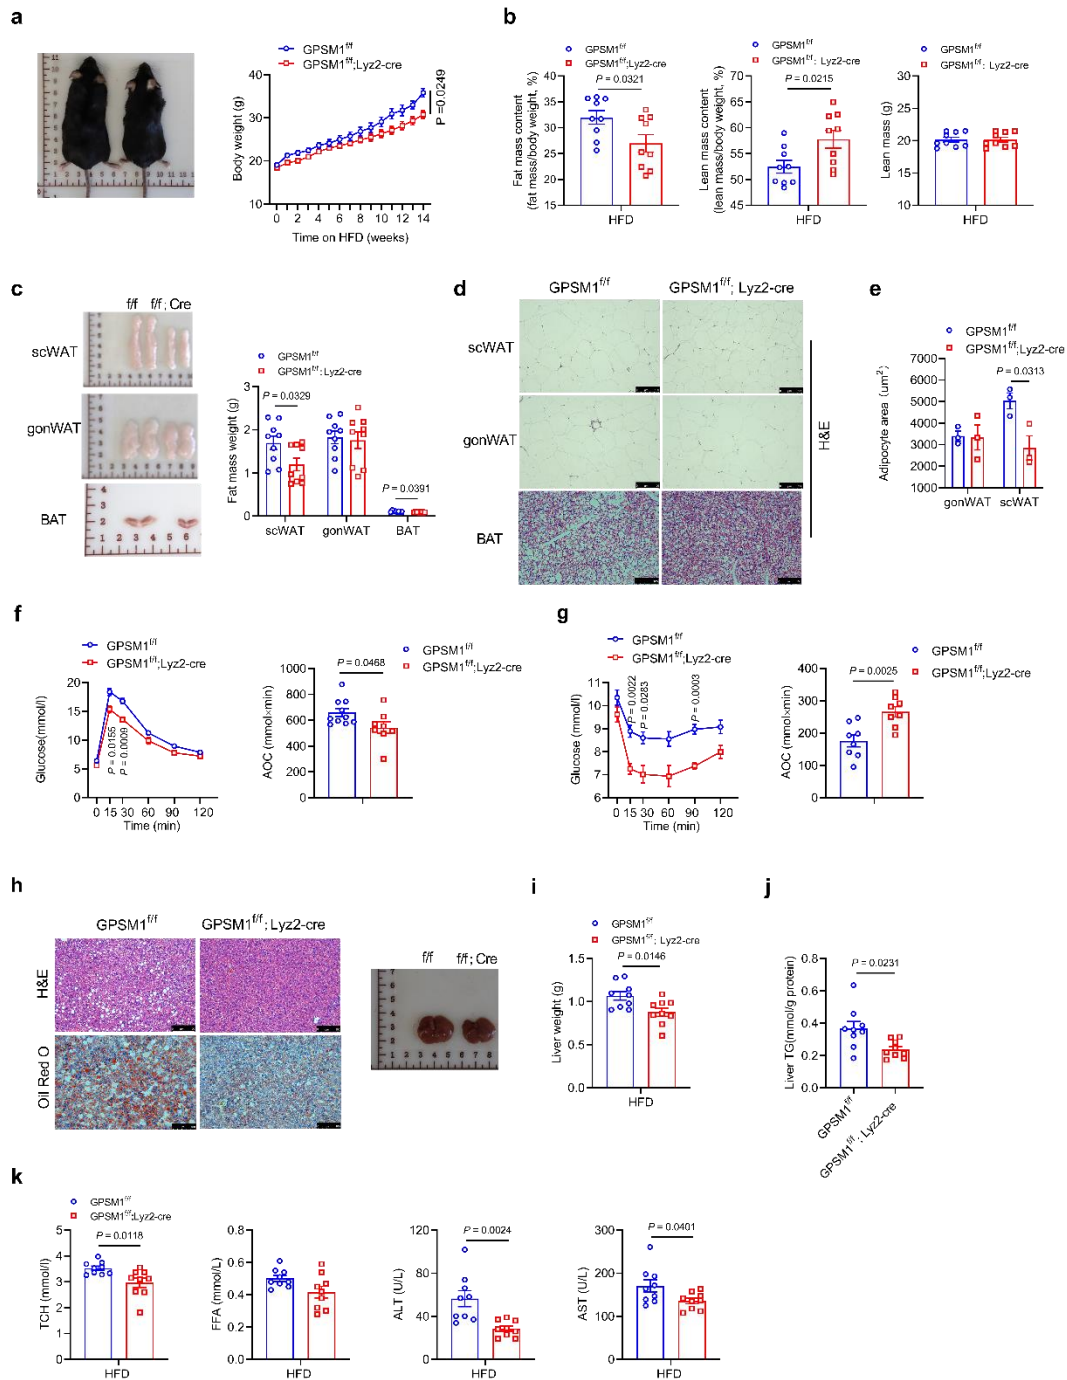

## Supplementary Fig.4 GPSM1 deficiency alleviates HFD-induced metabolic disorders in female mice.

Female *GPSM1<sup>ff</sup>*; *Lyz2-cre* mice and age-matched *GPSM1<sup>ff</sup>* littermates were fed a HFD for 14 weeks. HFD feeding started at 7 weeks of age. **a**, Representative images of mice (left) and body weight (right,  $n = 10$  biologically independent mice per group). **b**, Percent of fat (left), lean body mass (middle), and lean mass weight (right).  $n = 9$  biologically

independent mice per group. **c**, Representative images (left) and weight (right) of the indicated WAT from *GPSM1<sup>flf</sup>*; *Lyz2-cre* and *GPSM1<sup>flf</sup>* mice. n = 9 biologically independent mice per group. **d**, Representative H&E staining of scWAT, gonWAT and BAT sections. Scale bars, 100  $\mu$ m. **e**, Adipocyte area of scWAT and gonWAT (n = 3 biologically independent mice per group). **f**, GTT and AOC (n = 10 biologically independent mice for *GPSM1<sup>flf</sup>* and n = 8 biologically independent mice for *GPSM1<sup>flf</sup>*; *Lyz2-cre*). **g**, ITT and AOC (n = 8 biologically independent mice per group). **h**, Representative images of H&E staining (top) and Oil Red O (bottom) staining of liver sections (left). Scale bars, 100  $\mu$ m. Representative images of liver section (right). **i**, Liver weight (n = 9 biologically independent mice per group). **j**, Quantification of hepatic TG (n = 9 biologically independent mice per group). **k**, Serum levels of TCH, NEFA, ALT, and AST (n = 9 biologically independent mice per group). Independent experiments were repeated three times with similar results (**d**, **h**). All data are shown as means  $\pm$  SEM. *P* values are determined by unpaired two-tailed Student's *t*-test (**b**, **c**, **e** to **g**, **i** to **k**) or two-way ANOVA with Sidak's multiple-comparisons test (**a**, **f**, and **g**).

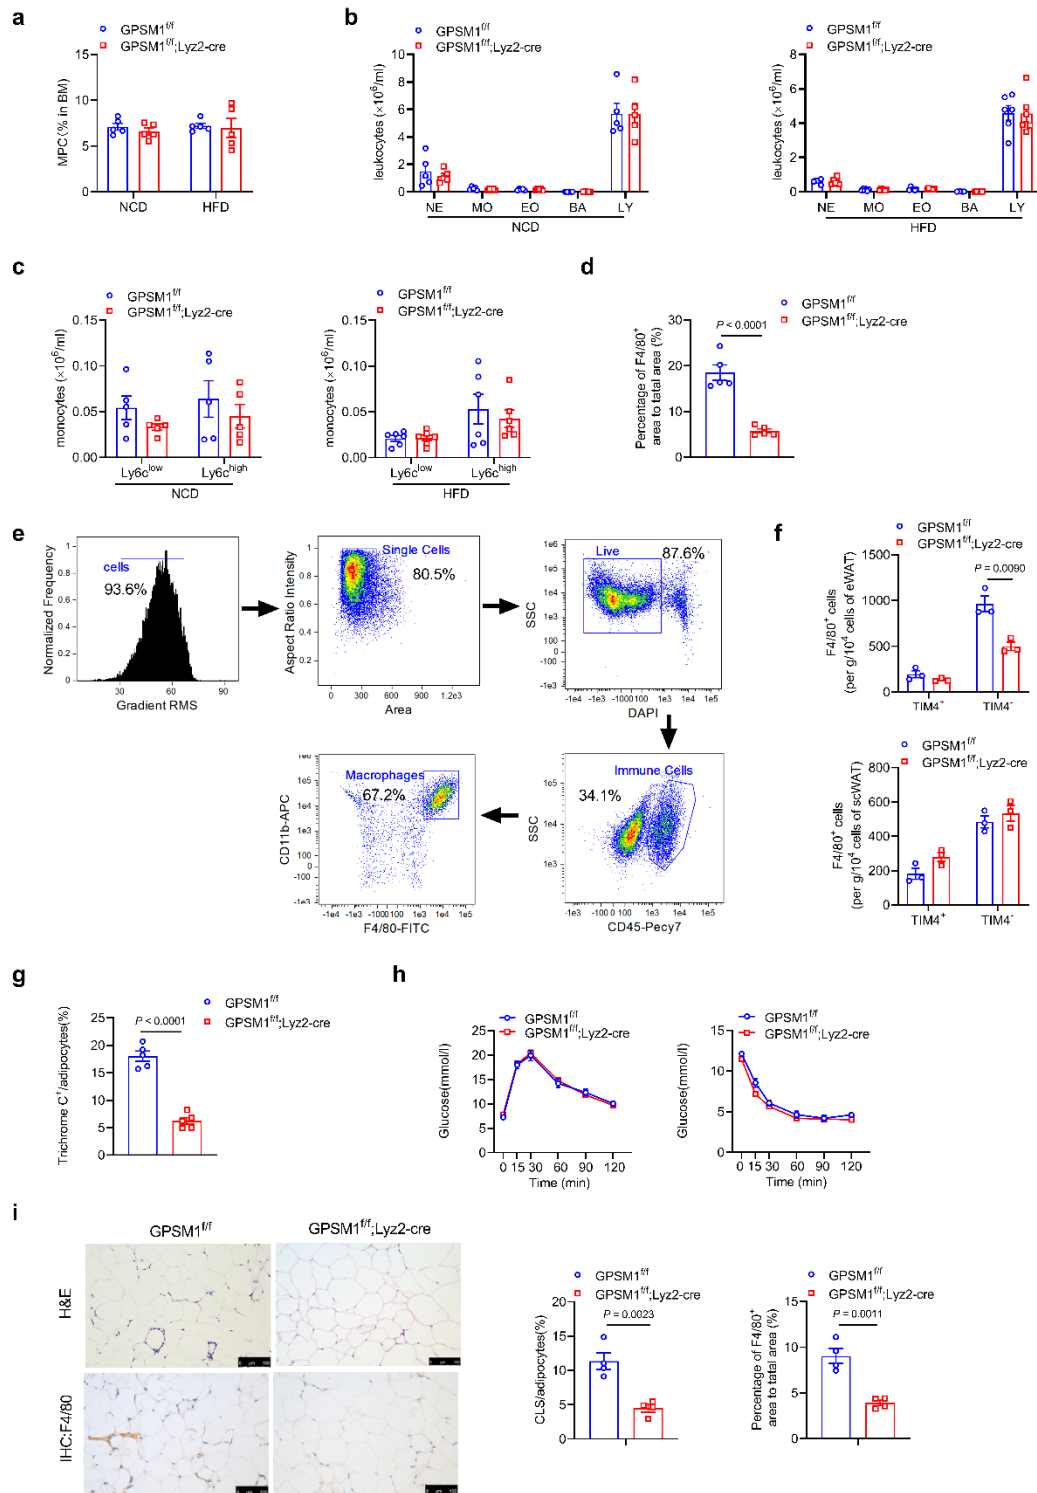

**Supplementary Fig.5 Analysis of metabolic inflammation in HFD-fed mice.**

**a**, Flow cytometry quantification of the Lin<sup>-</sup>Sca1<sup>+</sup>cKit<sup>+</sup> myeloid precursors (MPCs) in the bone marrow of *GPSM1<sup>fl/fl</sup>* and *GPSM1<sup>fl/fl</sup>;Lyz2-cre* mice both under NCD (12-week old) and HFD for 8 weeks (n = 5 biologically independent mice per condition). **b**, White blood cell counts both under the NCD (n = 5 biologically independent mice per group) and HFD

settings (n = 6 biologically independent mice per group). NE, neutrophils; MO, monocytes; EO, eosinophils; BA, basophils; LY, lymphocytes. **c**, The numbers of Ly-6C<sup>low</sup> and Ly-6C<sup>high</sup> monocytes of *GPSM1<sup>fl/fl</sup>* and *GPSM1<sup>fl/fl</sup>; Lyz2-cre* mice both under the NCD (n = 5 biologically independent mice per group) and HFD (n = 6 biologically independent mice per group) conditions. **d to g** Male *GPSM1<sup>fl/fl</sup>; Lyz2-cre* mice and age-matched *GPSM1<sup>fl/fl</sup>* littermates were fed a HFD for 12 weeks. HFD feeding started at 7 weeks of age. **d**, Quantification of the proportion of crown-like structure (n = 5 biologically independent mice per group). **e**, Gating strategy for analysis of macrophages in eWAT and scWAT. **f**, The numbers of TIM4<sup>+</sup> and TIM4<sup>-</sup> macrophages of eWAT and scWAT (n = 3 biologically independent mice per group). **g**, Quantification of the proportion of Trichrome C<sup>+</sup> area (n = 5 biologically independent mice per group). **h and i** Male *GPSM1<sup>fl/fl</sup>; Lyz2-cre* mice and age-matched *GPSM1<sup>fl/fl</sup>* littermates were fed a HFD for 5 weeks. HFD feeding started at 7 weeks of age. **h**, GTT and ITT (n = 9 biologically independent mice for *GPSM1<sup>fl/fl</sup>* and n = 10 biologically independent mice for *GPSM1<sup>fl/fl</sup>; Lyz2-cre*). **i**, Representative H&E and F4/80<sup>+</sup> staining of eWAT sections and quantification (n = 4 biologically independent mice per group). Scale bars, 100  $\mu$ m. All data are presented as means  $\pm$  SEM. *P* values are determined by unpaired two-tailed Student's *t*-test (**a to d, f, g, i**) or two-way ANOVA with Sidak's multiple-comparisons test (**h**).

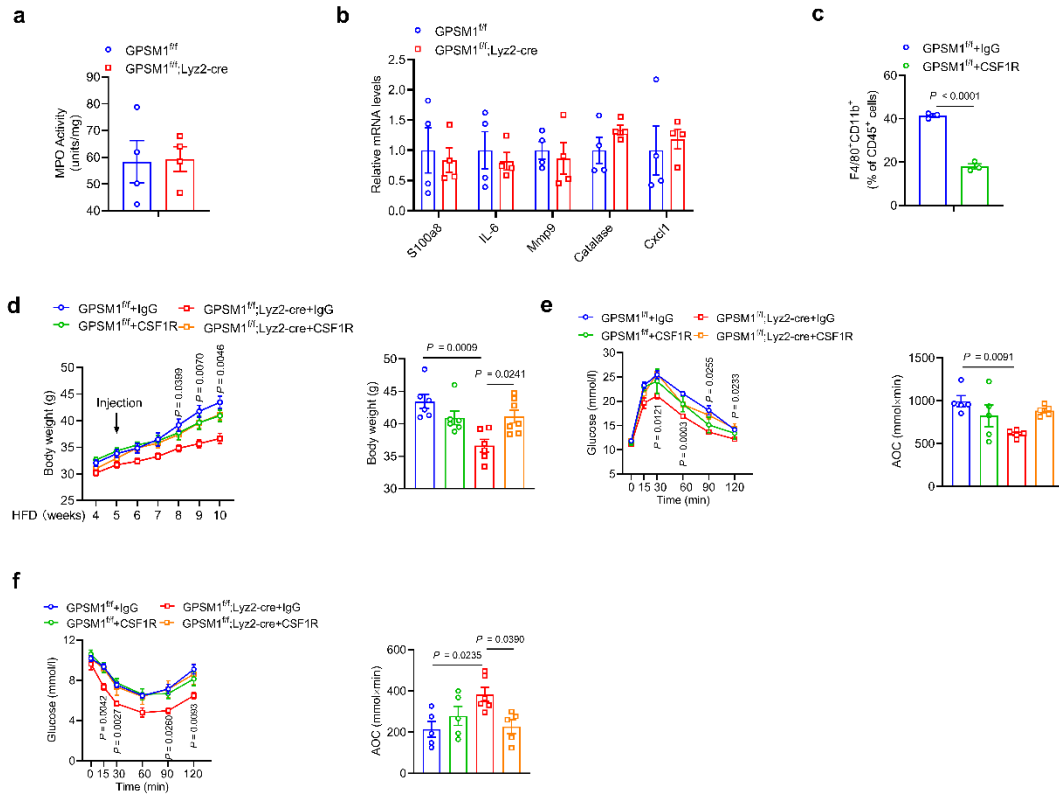

### Supplementary Fig.6 GPSM1 depletion does not affect inflammatory properties of neutrophils and characterization of CSF1R-administered mice fed a HFD.

**a** and **b** Male *GPSM1<sup>ff</sup>*; *Lyz2-cre* mice and age-matched *GPSM1<sup>ff</sup>* littermates were fed a HFD for 12 weeks. **a**, The myeloperoxidase (MPO) activity in eWAT (n = 4 biologically independent sample per group). **b**, RT-qPCR analysis indicating mRNA abundance of neutrophil inflammatory markers from sorted CD11b<sup>+</sup>Ly6G<sup>+</sup> neutrophils from the eWAT by flow cytometry (n = 4 biologically independent sample per group). **c** to **f** *GPSM1<sup>ff</sup>* and *GPSM1<sup>ff</sup>*; *Lyz2-cre* mice, which had been already HFD-fed for 5 weeks, injected intraperitoneally CSF1R antibody or isotype IgG (10 mg/kg), twice a week, for 5 weeks. **c**, Flow cytometry quantification of total macrophages of eWAT (n = 3 biologically independent mice per group). **d**, Body weight curve (left) and the body weight at 10-week HFD (right). n = 6 biologically independent mice for *GPSM1<sup>ff</sup>* injected with IgG or CSF1R and *GPSM1<sup>ff</sup>*; *Lyz2-cre* injected with IgG; n = 7 biologically independent mice for *GPSM1<sup>ff</sup>*; *Lyz2-cre* injected with CSF1R. **e**, GTT and AOC (n = 5 biologically independent mice per group). **f**, ITT and AOC (n = 5 biologically independent mice for *GPSM1<sup>ff</sup>* injected with IgG or CSF1R and *GPSM1<sup>ff</sup>*; *Lyz2-cre* injected with CSF1R; n = 6 biologically independent mice for

*GPSM1*<sup>fl/fl</sup>; *Lyz2*-cre injected with IgG). All data are shown as means  $\pm$  SEM. *P* values are determined by unpaired two-tailed Student's *t*-test (**a** to **c**), two-way ANOVA with Tukey's multiple-comparisons test (**d** to **f**) or one-way ANOVA with Tukey's multiple-comparisons test (**d** to **f**).

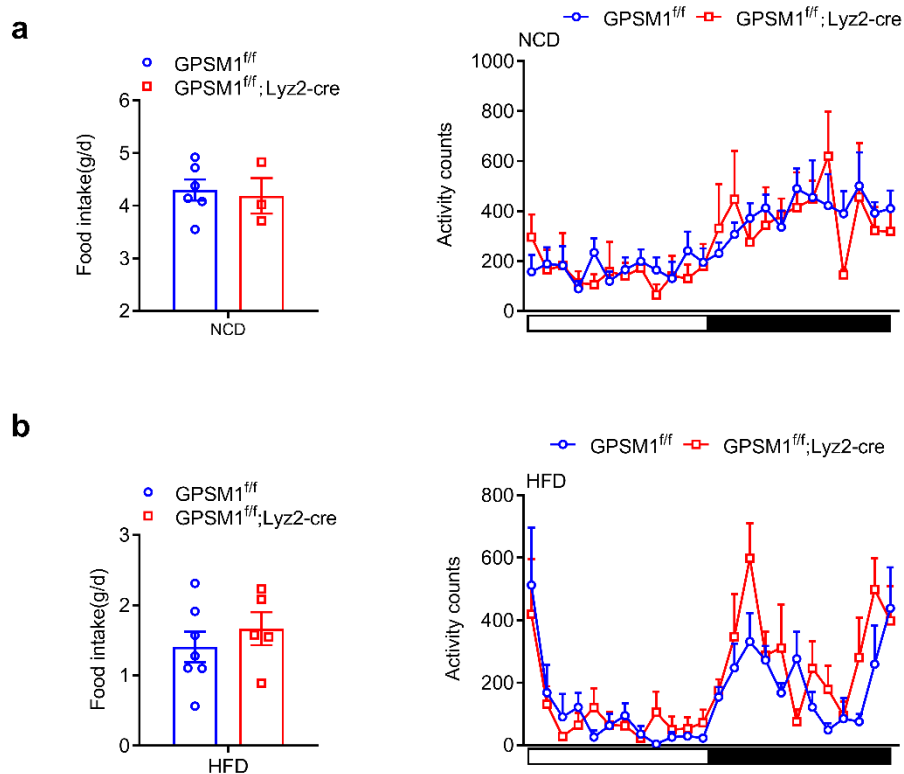

**Supplementary Fig.7 Metabolic cage studies of NCD- and HFD-fed mice.**

**a** Food intake and Activity counts of NCD-fed mice (n = 6 biologically independent mice for *GPSM1<sup>fl/fl</sup>* and n = 3 biologically independent mice for *GPSM1<sup>fl/fl</sup>; Lyz2-cre*) were monitored for a 24 h period. **b** Food intake and Activity counts of HFD-fed mice (n = 7 biologically independent mice for *GPSM1<sup>fl/fl</sup>* and n = 5 biologically independent mice for *GPSM1<sup>fl/fl</sup>; Lyz2-cre*) were monitored for a 24 h period. Throughout, data are presented as means  $\pm$  SEM. *P* values are determined by unpaired two-tailed Student's *t*-test and two-way ANOVA with Sidak's multiple-comparisons test.

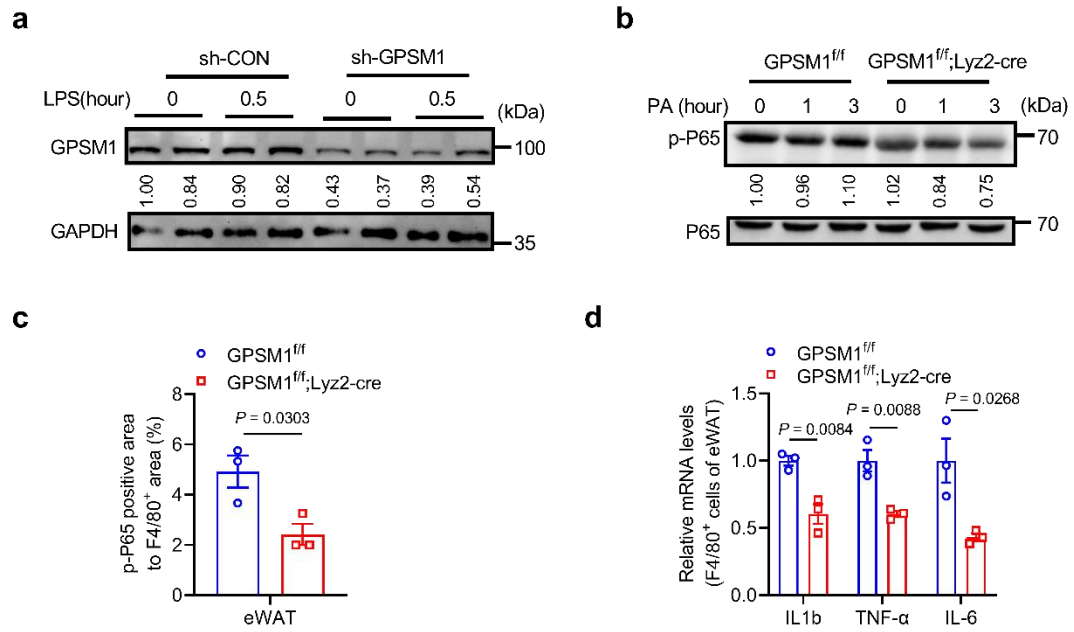

### Supplementary Fig.8 Macrophage GPSM1 regulates TLR4-induced NF-κB inflammatory signaling.

**a**, BMDMs were infected with Lv-shCON or Lv-shGPSM1 for 72 h and treated with LPS for additional indicated times. Immunoblot analysis of GPSM1 is shown (n = 2 independent samples per condition). **b**, BMDMs were treated with 250 μM Palmitic acid or vehicle control for indicated times. Immunoblot analysis of p-P65 and P65 is shown. **c**, Quantification of p-P65 positive area to F4/80<sup>+</sup> area of eWAT from *GPSM1*<sup>fl/fl</sup> and *GPSM1*<sup>fl/fl</sup>; *Lyz2-cre* mice subjected to HFD for 12 weeks (n = 3 biologically independent mice per group). **d**, RT-qPCR analysis of indicated genes from sorted F4/80<sup>+</sup> macrophages of eWAT (n = 3 biologically independent mice per group). Independent experiments were repeated three times with similar results (**a**, **b**). Throughout, data are presented as means ± SEM. *P* values are determined by unpaired two-tailed Student's *t*-test (**c**, **d**).

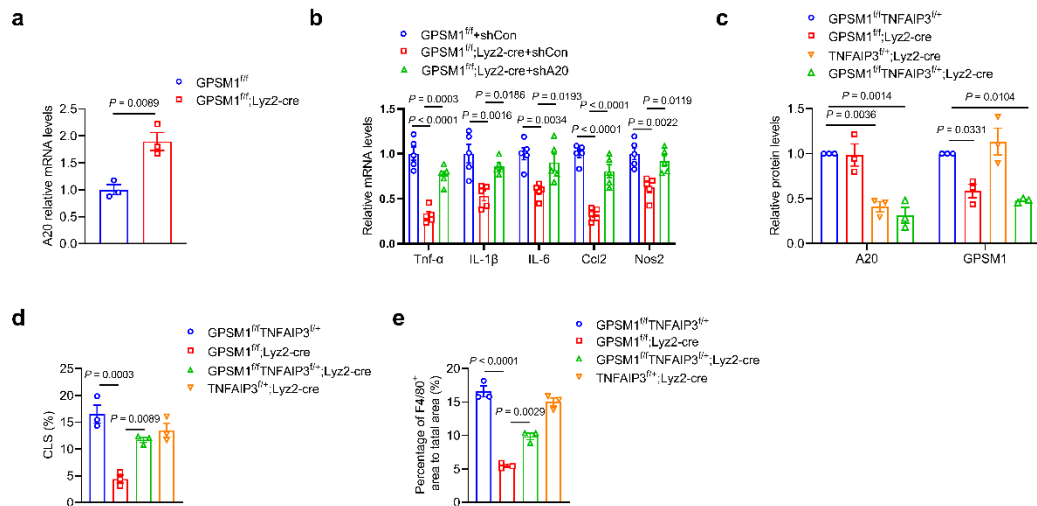

### Supplementary Fig.9 TNFAIP3 functions as a GPSM1 target for mediating the NF-κB pathway in macrophages.

**a**, A20 relative mRNA levels of eWAT from HFD-fed  $GPSM1^{fl/fl}$  and  $GPSM1^{fl/fl};Lyz2-cre$  mice ( $n = 3$  biologically independent sample per group, each sample was obtained from a pool of three mice ). **b**, RT-PCR indicating pro-inflammatory markers in  $GPSM1^{fl/fl}$  BMDMs infected with Lv-shCON and  $GPSM1^{fl/fl};Lyz2-cre$  BMDMs infected with Lv-shCON or Lv-shA20 for 72 h and treated with LPS for 3 h ( $n = 5$  independent samples per condition). **c**, Quantification of A20 and GPSM1 protein levels in BMDMs from the mice of four genotypes ( $n = 3$  biologically independent mice per group). **d**, Quantification of the proportion of crown-like structure ( $n = 3$  biologically independent mice per group). **e**, Quantification of the proportion of F4/80<sup>+</sup> area ( $n = 3$  biologically independent mice per group). All data are presented as means  $\pm$  SEM.  $P$  values are determined by unpaired two-tailed Student's  $t$ -test (**a**) or one-way ANOVA with Tukey's multiple-comparisons test (**b** to **e**).

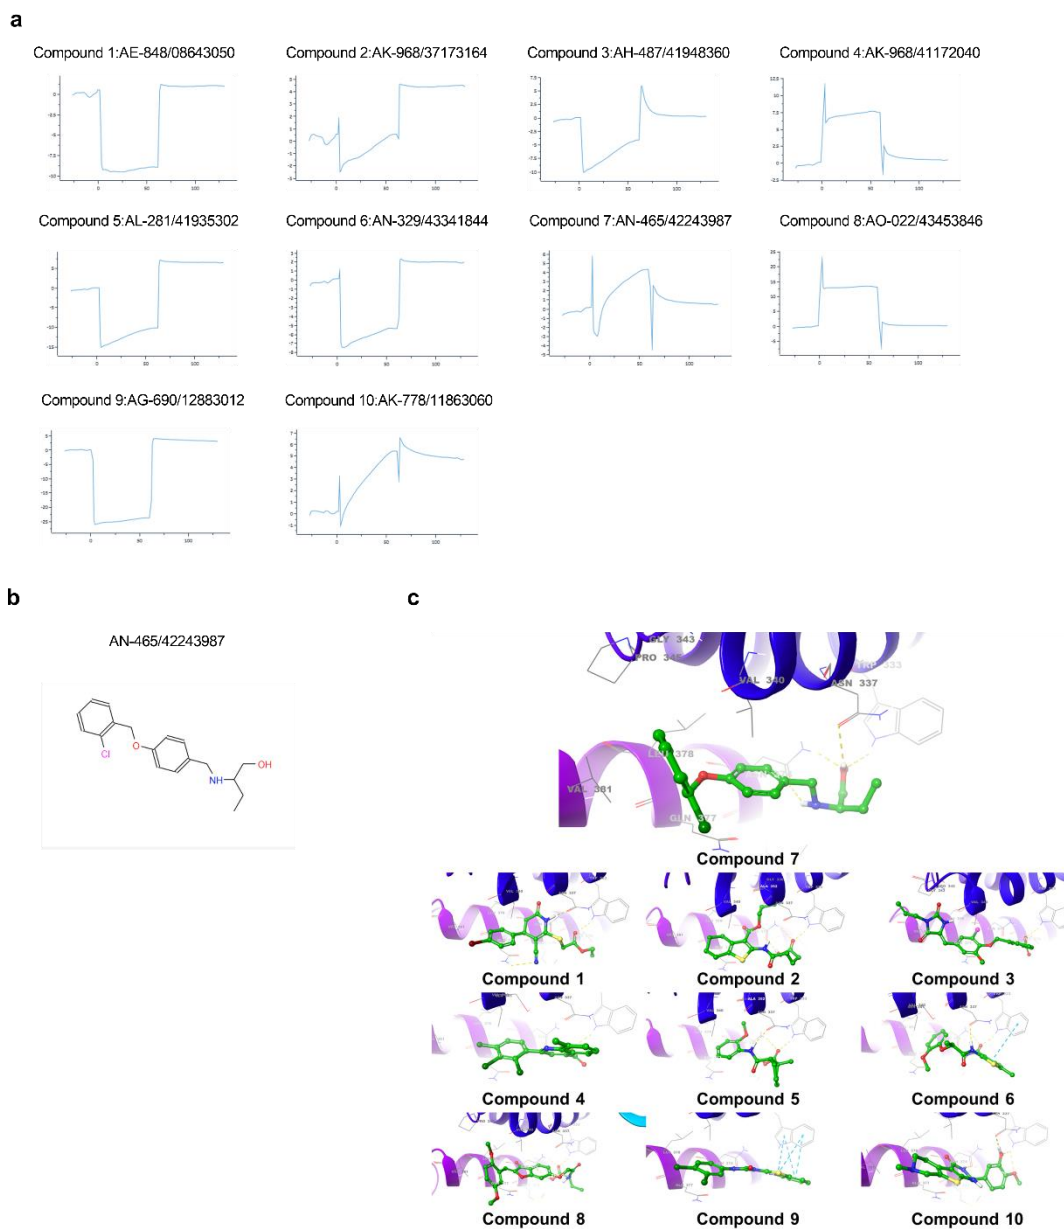

**Supplementary Fig.10 Screen potential GPSM1 inhibitors.**

**a**, SPR assay with Biacore to verify the affinity between GPSM1 protein and small-molecular compounds. The compounds were tested for binding with concentration of 50  $\mu\text{mol/L}$ . **b**, The chemical structure of compound 7 (AN-465/42243987). **c**, Docking poses for the top 10 molecules. Ligands (green) and interacted residues (gray) in the receptor are represented as stick. The yellow dash line stands for hydrogen bond and  $\pi$ - $\pi$  interaction is exhibited as the cyan dash line.

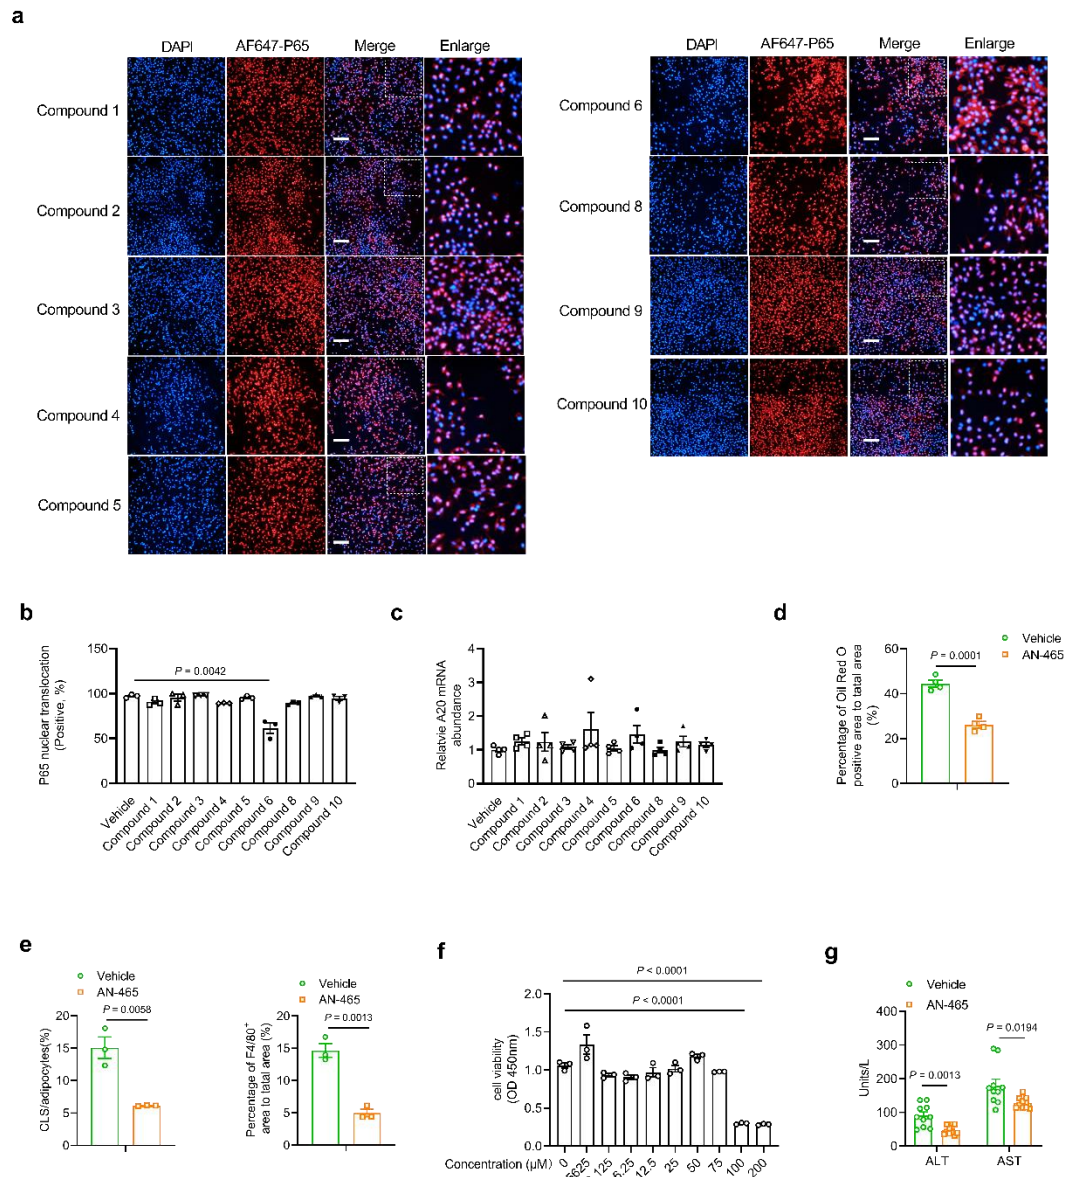

**Supplementary Fig.11 The effects of potential GPSM1 inhibitors in *in vitro* and *in vivo* experiments.**

**a**, Representative immunofluorescence images indicating P65 nuclei translocation of BMDMs treated with 50μM other 9 small-molecular compounds for 16 hours and then stimulated with LPS for 1 hour, showed by high-content screen. BMDMs were stained for P65 (red) and DAPI (blue). **b**, Quantification of the proportion of P65 nuclear translocation exhibited in **a** (n= 3 independent samples per group). **c**, RT-PCR indicating A20 mRNA levels of BMDMs treated with 50μM compounds or vehicle control for 16 hours and then stimulated with LPS for 20 min (n= 4 independent samples per group). **d**, Percentage of Oil Red O<sup>+</sup> area of liver from DIO mice treated with either AN-465 or vehicle (n = 4

biologically independent mice per group). **e**, Quantification of the proportion of crown-like structure and F4/80<sup>+</sup> area of eWAT (n = 4 biologically independent mice per group). **f**, CCK8 assays were performed in BMDMs after cells were treated with increasing doses of AN-465/42243987 (n= 3 independent samples per group). **g**, Serum ALT and AST levels of DIO mice treated with either AN-465 or vehicle (n = 10 biologically independent mice per group). Independent experiments were repeated three times with similar results (**a**). All data are presented as means  $\pm$  SEM. *P* values are determined by two-tailed Student's *t*-test (**b** to **g**).

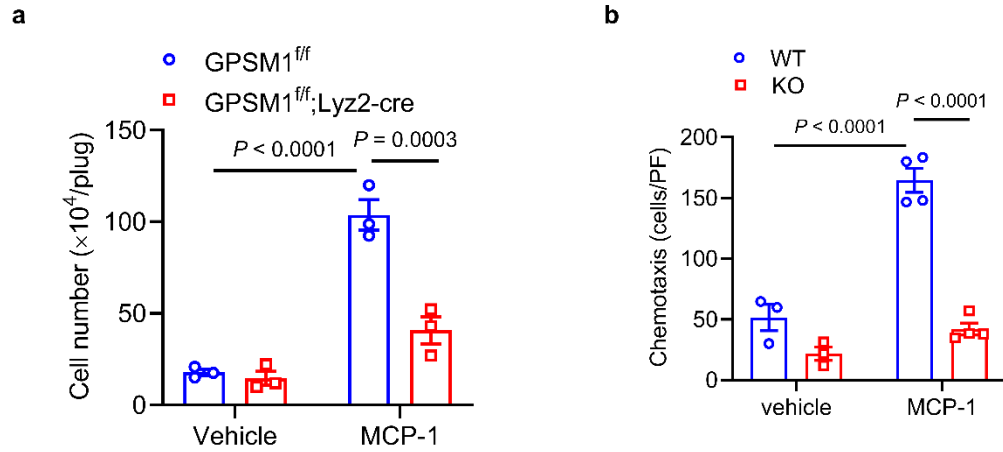

**Supplementary Fig.12 Assessment of monocyte chemotactic activity *in vivo* and *in vitro*.**

**a**, Recruitment monocyte-derived macrophages into implanted Matrigel plugs loaded with MCP-1 of  $GPSM1^{f/f}$  and  $GPSM1^{f/f};Lyz2\text{-}cre$  mice ( $n = 3$  biologically independent mice per group). **b**, Chemotaxis of WT and  $GPSM1$  KO THP-1 cells ( $n = 3$  or 4 independent samples per condition). All data are presented as means  $\pm$  SEM.  $P$  values are determined by one-way ANOVA with Tukey's multiple-comparisons test.

**Supplementary Table 1. Clinical characteristics of subjects**

| <b>Variable</b>                    | <b>Normal weight<br/>(n = 36)</b> | <b>Overweight/Obesity<br/>(n = 61)</b> | <b>P value</b>           |
|------------------------------------|-----------------------------------|----------------------------------------|--------------------------|
| Male/ female (n)                   | 6/30                              | 13/48                                  | 0.5823                   |
| Age (years)                        | 44.33±10.66                       | 41.03±10.60                            | 0.1427                   |
| BMI (kg/m <sup>2</sup> )           | 21.85±1.56                        | 33.01±7.06                             | 4.5082×10 <sup>-15</sup> |
| SBP (mmHg)                         | 120.86±12.83                      | 129.08±17.05                           | 0.0152                   |
| DBP (mmHg)                         | 80.14±9.47                        | 82.50±13.53                            | 0.3662                   |
| Fasting plasma glucose<br>(mmol/l) | 4.83<br>(4.51, 5.61)              | 5.11<br>(4.75, 5.70)                   | 0.2742                   |
| HbA1c (%)                          | 5.50<br>(5.40, 6.40)              | 5.80<br>(5.10, 6.60)                   | 0.7140                   |
| Triglyceride (mmol/l)              | 0.94<br>(0.71, 1.07)              | 1.57<br>(1.00, 2.31)                   | 0.0018                   |
| Total cholesterol (mmol/l)         | 4.56<br>(3.98, 5.31)              | 4.83<br>(4.48, 5.30)                   | 0.2255                   |
| ALT(U/L)                           | 16.00<br>(13.00, 20.00)           | 26.00<br>(17.50, 52.00)                | 0.0049                   |
| AST(U/L)                           | 22.00<br>(18.00, 26.00)           | 22.00<br>(18.00, 33.50)                | 0.1422                   |
| Low-Density Lipoprotein-c          | 2.59<br>(2.17, 3.27)              | 2.94<br>(2.43, 3.53)                   | 0.1901                   |
| High-Density Lipoprotein-c         | 1.12<br>(0.88, 1.29)              | 1.06<br>(0.94, 1.19)                   | 0.5238                   |

Normal weight: BMI < 24; Overweight/Obesity: BMI ≥ 24

Data are presented as the mean ± SD or median (interquartile range) or n.

Comparisons are done using two-tailed Student's t-test.

**Supplementary Table 2. Oligonucleotide primers for Loxp sites**

|                    | Forward primer (5'-3')             | Reverse primer (5'-3')             |
|--------------------|------------------------------------|------------------------------------|
| GPSM1-Loxp primer1 | CCCAGAAATGCCAGATTACG               | CTTGGGCTGCCAGAATTTCTC              |
| GPSM1-Loxp primer2 | TTACAGTCGGCCAGGCTGAC               | CTTGGGCTGCCAGAATTTCTC              |
| A20-Loxp primer    | CTATCTGTGGTGGACAAAGGCT<br>ACTCTCGG | GAATCGCCTACCTAGGAATCAG<br>CTGTCCAG |

**Supplementary Table 3. Oligonucleotide primers for ChIP and luciferase reporter assays**

|                                        | Forward primer (5'-3')                                                                                             | Reverse primer (5'-3')                                                                                          |
|----------------------------------------|--------------------------------------------------------------------------------------------------------------------|-----------------------------------------------------------------------------------------------------------------|
| ChIP-Tnfaip3                           | ACCTATTGCATTTCCAGTTCCCA                                                                                            | GAGAAACTCCTAGGTCCCGC                                                                                            |
| ChIP- $\beta$ -globin                  | AAGCCTGATTCCGTAGAGCCACAC                                                                                           | CCCACAGGCAAGAGACAGCAGC                                                                                          |
| PGL4.17- <i>Tnfaip3</i> (promoter)-WT  | CTGAGCTCGCTAGCCTCGAGCCTT<br>ACTGGCGAGAGGAGGA                                                                       | ACCGGATTGCCAAGCTTTTCGCAA<br>GTCCCAAGTCCTG                                                                       |
| PGL4.17- <i>Tnfaip3</i> (promoter)-Mut | Primer1:<br>CTGAGCTCGCTAGCCTCGAGCCTT<br>ACTGGCGAGAGGAGGA<br>Primer2:<br>ATTTCCACATGGATGTTTTTTTTCCC<br>CAGCTTCCGAAA | Primer1:<br>TTTCGGAAGCTGGGGAAAAAAAAC<br>ATCCATGTGGAAAT<br>Primer2:<br>ACCGGATTGCCAAGCTTTTCGCAA<br>GTCCCAAGTCCTG |

**Supplementary Table 4. Oligonucleotide primers for quantitative RT-PCR analysis**

| Gene         | Forward primer (5'-3')     | Reverse primer (5'-3')   |
|--------------|----------------------------|--------------------------|
| 36b4         | AAGCGCGTCCTGGCATTGTCT      | CCGCAGGGGCAGCAGTGGT      |
| Acc1         | ATGGGCGGAATGGTCTCTTTC      | TGGGGACCTTGTCTTCATCAT    |
| Acta2        | GTCCAGACATCAGGGAGTAA       | TCGGATACTTCAGCGTCAGGA    |
| Actin        | AGTGTGACGTTGACATCCGTA      | GCCAGAGCAGTAATCTCCTTCT   |
| Arg1         | CTCCAAGCCAAAGTCCTTAGAG     | GGAGCTGTCATTAGGGACATCA   |
| Catalase     | ACATGGTCTGGGACTTCTGG       | CAAGTTTTTGATGCCCTGGT     |
| Ccl2         | TAAAAACCTGGATCGGAACCAA     | GCATTAGCTTCAGATTTACGGGT  |
| Ccl3         | CATGACACTCTGCAACCAAGTCTTC  | GAGCAAAGGCTGCTGGTTTCA    |
| Ccl7         | CAATGCATCCACATGCTGCTA      | GACCCACTTCTGATGGGCTTC    |
| CD36         | ATGGGCTGTGATCGGAACTG       | GTCTTCCCAATAAGCATGTCTCC  |
| CD45         | TCCAGGTGTGTTATCCACGC       | TGTGTCTGCAGGAATGGTCC     |
| Col1a1       | TGACTGGAAGAGCGGAGAGT       | GTTCGGGCTGATGTACCACT     |
| Col3a1       | GTGCTCCTGGACAGAATGGT       | CACCCTTTACACCCTGAGGA     |
| Col4a1       | GCCAAGTGTGCATGAGAAGA       | AGCGGGGTGTGTTAGTTACG     |
| Col6a1       | GATGAGGGTGAAGTGGGAGA       | CAGCACGAAGAGGATGTCAA     |
| Col6a2       | ATGTGAGGGAGACCTGTGGA       | TGTGCCTGTTTCTGACTTGG     |
| Col6a3       | CAGAACCATTGTTTCTCACT       | AGGACTACACATCTTTTCAC     |
| Cpt-1a       | CTCAGTGGGAGCGACTCTTCA      | GGCCTCTGTGGTACACGACAA    |
| Cxcl1        | TGCACCCAAACCGAAGTC         | GTCAGAAGCCAGCGTTCACC     |
| Fabp4        | CAGCGTAAATGGGGATTTGG       | CCGCCATCTAGGGTTATGAT     |
| Fasn         | GGAGGTGGTGATAGCCGGTAT      | TGGGTAATCCATAGAGCCCAG    |
| Gpsm1        | CTTTCTTCGAGGCTGCTGTG       | TCATCGAATCGGCCTAGGAC     |
| IL-10        | GCTATGCTGCCTGCTCTTACT      | CCTGCTGATCCTCATGCCA      |
| IL-1 $\beta$ | GCAACTGTTCTGAACTCAACT      | ATCTTTTGGGGTCCGTCAACT    |
| IL-6         | CCACGGCCTTCCCTACTTC        | TTGGGAGTGGTATCCTCTGTGA   |
| Lcad         | GCGAAATACTGGGCATCTGAA      | TCCGTGGAGTTGCACACATT     |
| Leptin       | GACACCAAACCCCTCAT          | CAGTGTCTGGTCCATCT        |
| Mcad         | GACATTTGGAAAGCTGCTAGTG     | TCACGAGCTATGATCAGCCTCTG  |
| Mmp2         | TAACCTGGATGCCGTCGT         | TTCAGGTAATAAGCACCCCTTGAA |
| Mmp9         | CGTCGTGATCCCCACTTACT       | AACACACAGGGTTTGCCTTC     |
| Mrc1         | CTCTGTTTCAGCTATTGGACGC     | TGGCACTCCCAAACATAATTTGA  |
| Nos2         | GTTCTCAGCCCAACAATACAAGA    | GTGGACGGGTCGATGTCAC      |
| Pdk4         | TTCACACCTTCACCACATGC       | AAAGGGCGGTTTTCTTGATG     |
| Retnla       | CCAATCCAGCTAACTATCCCTCC    | ACCCAGTAGCAGTCATCCCA     |
| S100A8       | GGAAATCACCATGCCCTCTA       | TGGCTGTCTTTGTGAGATGC     |
| Scd1         | GCTGGAGTACGTCTGGAGGAA      | TCCCGAAGAGGCAGGTGTAG     |
| Srebp-1c     | GCAGCCACCATCTAGCCTG        | CAGCAGTGAGTCTGCCTTGAT    |
| Tgfb1        | GTGTGGAGCAACATGTGGAACCTCTA | TTGGTTTCAGCCACTGCCGTA    |
| TNF-a        | GACGTGGAAGTGGCAGAAGAG      | ACCGCCTGGAGTTCTGGAA      |
| Ucp2         | GCTGGTGGTGGTCCGAGATA       | ACTGGCCCAAGGCAGAGTT      |

## Gel source data

Supplemental figure 3a

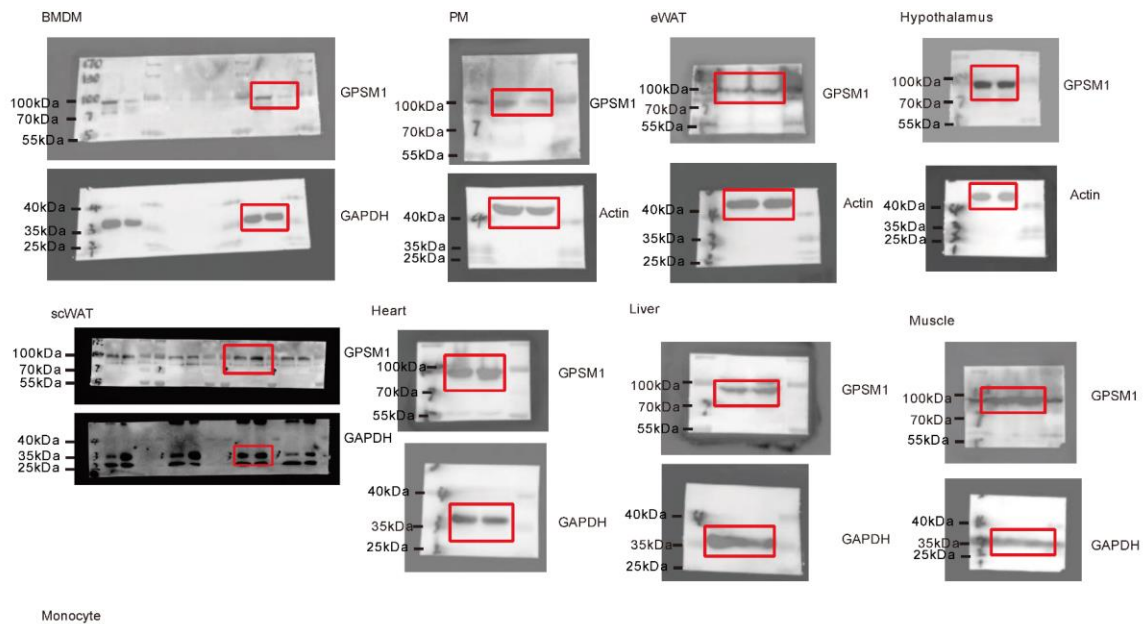

Monocyte

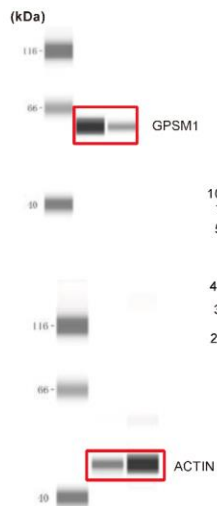

Supplemental figure 9a

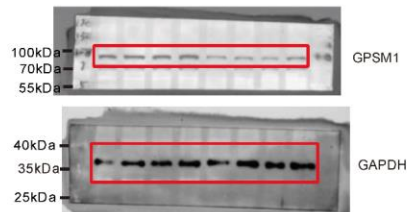

Supplemental figure 9b

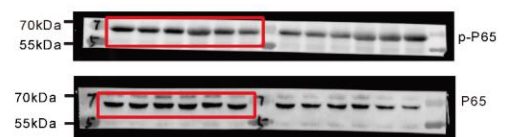

Supplement: MOESM1 [file 41467_2022_34998_MOESM1_ESM.pdf]
